# Supplementary material for: Bacterial Lipopolysaccharide Induced Alterations of Genome-Wide DNA Methylation and Promoter Methylation of Lactation-Related Genes in Bovine Mammary Epithelial Cells
Source: MDPI journal article supplement (doi:10.3390/toxins11050298), 2019-05-24
Supplement: s1 [file s1]

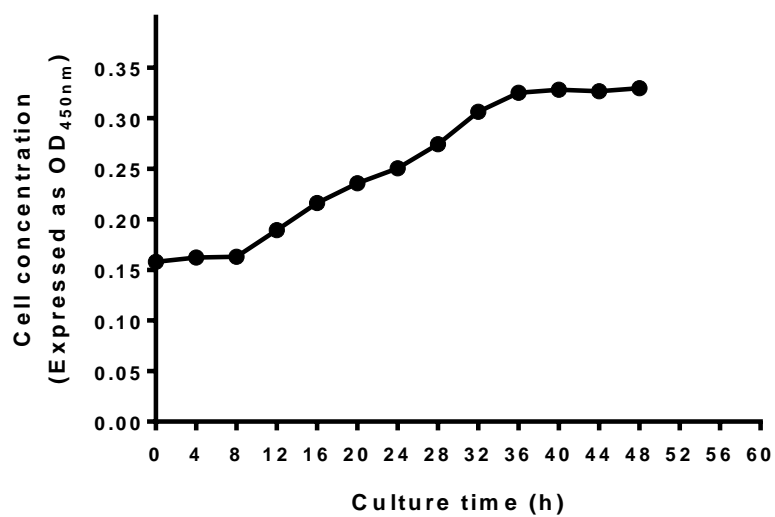

**Figure S1.** Growth curve of the MAC-T bovine mammary epithelial cells. The growth of cells was measured ( $n = 5$ ) by using CCK-8 (Cell Counting Kit 8, Dojindo, Japan). The optical density (OD) was determined at 450 nm on a microplate reader (Bio-Rad, xMark<sup>TM</sup>, USA).
