# Supplementary material for: Bacterial Lipopolysaccharide Induced Alterations of Genome-Wide DNA Methylation and Promoter Methylation of Lactation-Related Genes in Bovine Mammary Epithelial Cells
Source: MDPI journal article supplement (doi:10.3390/toxins11050298), 2019-05-24
Supplement: s1 [file s1]

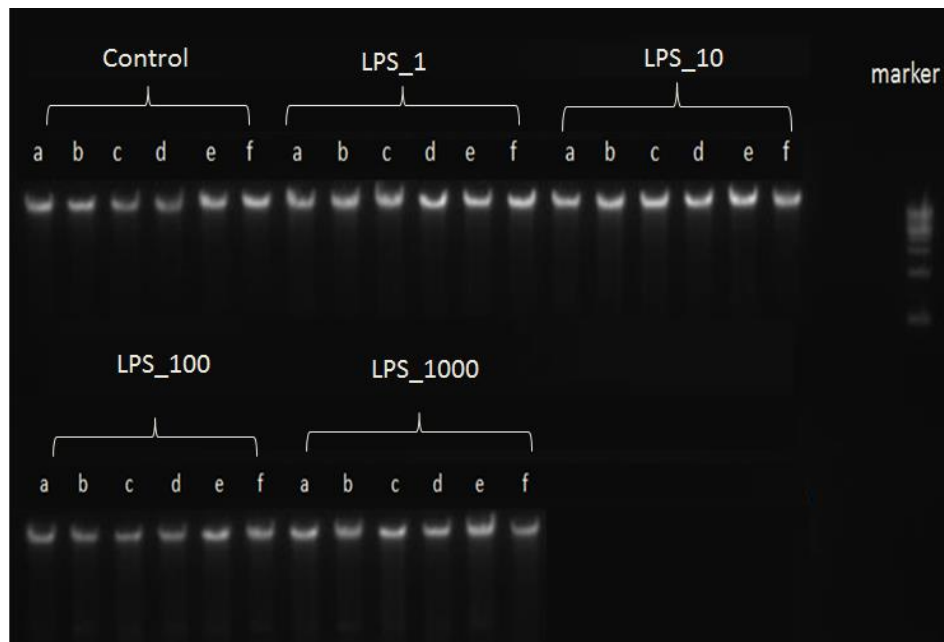

**Figure S2.** DNA sample integrity examined by electrophoresis. Each band represents one DNA sample and there was no degradation since no smears were seen. Control, without LPS; LPS\_1, 1 EU/mL; LPS\_10, 10 EU/mL; LPS\_100, 100 EU/mL; and LPS\_1000, 1000 EU/mL.
