# Supplementary material for: Bacterial Lipopolysaccharide Induced Alterations of Genome-Wide DNA Methylation and Promoter Methylation of Lactation-Related Genes in Bovine Mammary Epithelial Cells
Source: Toxins (Basel). 2019 May 24;11(5):298. doi: 10.3390/toxins11050298 (PMC6563294; doi:10.3390/toxins11050298)
Supplement: Supplementary file 1 [file toxins-11-00298-s001.zip]

Archive with 4 entries (4 files):
- toxins-485250-SI/Figure S1.pdf
- toxins-485250-SI/Figure S2.pdf
- toxins-485250-SI/Table S1.xlsx
- toxins-485250-SI/Table S2.xlsx
