# Supplementary material for: Bacterial Lipopolysaccharide Induced Alterations of Genome-Wide DNA Methylation and Promoter Methylation of Lactation-Related Genes in Bovine Mammary Epithelial Cells
Source: Toxins (Basel). 2019 May 24;11(5):298. doi: 10.3390/toxins11050298 (PMC6563294; doi:10.3390/toxins11050298)
Supplement: Supplementary file 1 [file toxins-11-00298-s001.zip › toxins-485250-SI/Table S1.xlsx]

## Sheet: upstream2k.peak.enrichGO.genenu
Table S1. Numbers of methylated genes in the upstream 2k region in gene ontology (GO) function analysis under different lipopolysaccharide (LPS) treatments.
Term	Control	LPS_1	LPS_10	LPS_100	LPS_1000
GO:0000375: RNA splicing, via transesterification reactions	42	42	44	38	42
GO:0000377: RNA splicing, via transesterification reactions with bulged adenosine as nucleophile	42	42	44	38	42
GO:0006139: nucleobase-containing compound metabolic process	833	792	889	821	681
GO:0006351: transcription, DNA-templated	502	463	526	486	398
GO:0006725: cellular aromatic compound metabolic process	858	815	911	844	703
GO:0006807: nitrogen compound metabolic process	953	923	1021	928	772
GO:0007049: cell cycle	184	172	186	178	169
GO:0008152: metabolic process	1644	1617	1740	1622	1354
GO:0009058: biosynthetic process	752	681	784	705	591
GO:0009059: macromolecule biosynthetic process	654	582	684	614	512
GO:0016070: RNA metabolic process	614	584	666	614	507
GO:0018130: heterocycle biosynthetic process	541	502	571	525	435
GO:0019438: aromatic compound biosynthetic process	538	499	568	523	433
GO:0032774: RNA biosynthetic process	502	466	528	488	401
GO:0034641: cellular nitrogen compound metabolic process	907	866	971	882	732
GO:0034645: cellular macromolecule biosynthetic process	649	576	678	609	505
GO:0043170: macromolecule metabolic process	1240	1201	1320	1241	1019
GO:0044237: cellular metabolic process	1427	1402	1521	1410	1186
GO:0044238: primary metabolic process	1453	1424	1555	1447	1192
GO:0044249: cellular biosynthetic process	724	657	757	683	570
GO:0044260: cellular macromolecule metabolic process	1097	1047	1174	1095	901
GO:0044267: cellular protein metabolic process	537	522	579	530	446
GO:0046483: heterocycle metabolic process	853	811	906	837	695
GO:0071704: organic substance metabolic process	1532	1503	1630	1521	1262
GO:0090304: nucleic acid metabolic process	708	666	754	703	579
GO:0097659: nucleic acid-templated transcription	502	463	526	486	398
GO:1901360: organic cyclic compound metabolic process	883	840	944	874	725
GO:1901362: organic cyclic compound biosynthetic process	550	508	579	536	443
GO:1901576: organic substance biosynthetic process	731	657	768	690	575
GO:0001071: nucleic acid binding transcription factor activity	203	172	203	180	157
GO:0003676: nucleic acid binding	528	482	553	499	414
GO:0003677: DNA binding	208	185	213	192	171
GO:0003723: RNA binding	169	149	177	158	134
GO:0005488: binding	1945	1952	2066	1966	1577
GO:0005515: protein binding	933	952	1004	974	766
GO:0016740: transferase activity	401	404	434	397	335
GO:0016746: transferase activity, transferring acyl groups	46	49	44	41	45
GO:0016747: transferase activity, transferring acyl groups other than amino-acyl groups	41	44	40	36	40
GO:0019899: enzyme binding	214	204	219	212	176
GO:0043167: ion binding	676	703	718	677	563
GO:0046872: metal ion binding	347	369	382	355	311
GO:0097159: organic cyclic compound binding	905	861	949	882	711
GO:1901363: heterocyclic compound binding	861	821	910	843	686
GO:0005622: intracellular	2034	2041	2137	2047	1678
GO:0005623: cell	2223	2235	2328	2237	1828
GO:0005634: nucleus	364	373	405	378	318
GO:0005654: nucleoplasm	103	110	125	115	101
GO:0005737: cytoplasm	762	778	775	761	597
GO:0005739: mitochondrion	97	98	102	101	86
GO:0005769: early endosome	14	11	9	12	17
GO:0012505: endomembrane system	323	342	312	332	271
GO:0031090: organelle membrane	201	197	192	200	167
GO:0031974: membrane-enclosed lumen	311	320	344	324	270
GO:0031981: nuclear lumen	301	304	330	312	261
GO:0032991: macromolecular complex	607	596	643	611	527
GO:0043226: organelle	1810	1808	1901	1817	1498
GO:0043227: membrane-bounded organelle	1633	1629	1710	1636	1347
GO:0043229: intracellular organelle	1753	1740	1833	1746	1436
GO:0043231: intracellular membrane-bounded organelle	1567	1549	1627	1555	1278
GO:0043233: organelle lumen	309	317	341	322	269
GO:0043234: protein complex	418	400	441	416	358
GO:0044422: organelle part	819	840	872	839	700
GO:0044424: intracellular part	2033	2040	2135	2046	1677
GO:0044428: nuclear part	360	368	402	375	316
GO:0044429: mitochondrial part	96	97	102	100	85
GO:0044444: cytoplasmic part	762	778	775	761	597
GO:0044446: intracellular organelle part	790	800	837	807	670
GO:0044451: nucleoplasm part	103	110	125	115	101
GO:0044464: cell part	2223	2235	2328	2237	1828
GO:0070013: intracellular organelle lumen	309	316	340	322	269
GO:1902494: catalytic complex	92	98	107	91	91
GO:1990234: transferase complex	75	77	84	73	76
