# Supplementary material for: Bacterial Lipopolysaccharide Induced Alterations of Genome-Wide DNA Methylation and Promoter Methylation of Lactation-Related Genes in Bovine Mammary Epithelial Cells
Source: Toxins (Basel). 2019 May 24;11(5):298. doi: 10.3390/toxins11050298 (PMC6563294; doi:10.3390/toxins11050298)
Supplement: Supplementary file 1 [file toxins-11-00298-s001.zip › toxins-485250-SI/Table S2.xlsx]

## Sheet: upstream2k.peak.enrichKEGG.gene
Table S2. Numbers of methylated genes in the 2 kb upstream region in Kyoto Encyclopedia of Genes and Genomes (KEGG) metabolic pathway analyses under different lipopolysaccharide (LPS) treatments.
Pathway	Control	LPS_1	LPS_10	LPS_100	LPS_1000
AMPK signaling pathway	30	39	36	31	29
Adherens junction	22	20	18	24	19
Apoptosis	21	27	24	22	22
Base excision repair	10	10	11	9	12
Biosynthesis of antibiotics	44	59	62	57	46
Biosynthesis of secondary metabolites	77	93	102	89	69
Biosynthesis of unsaturated fatty acids	8	10	10	6	11
Cell cycle	33	30	34	36	29
Cholinergic synapse	21	32	25	23	16
Dopaminergic synapse	32	38	34	32	24
Endocytosis	59	62	60	66	51
Estrogen signaling pathway	21	31	25	24	26
Fatty acid metabolism	14	17	15	12	14
Focal adhesion	51	54	56	57	45
Glycosphingolipid biosynthesis - ganglio series	5	9	7	5	6
Glycosphingolipid biosynthesis - globo series	5	11	5	6	4
Hippo signaling pathway	45	45	39	37	38
Inositol phosphate metabolism	19	22	16	16	13
Insulin signaling pathway	30	37	39	42	31
Longevity regulating pathway - mammal	17	28	24	24	20
Lysine degradation	18	18	15	21	13
Lysosome	37	36	36	31	25
MAPK signaling pathway	65	58	63	60	45
Metabolic pathways	275	298	302	281	230
N-Glycan biosynthesis	15	18	16	15	14
NF-kappa B signaling pathway	28	27	25	23	14
Other types of O-glycan biosynthesis	11	13	7	9	9
PI3K-Akt signaling pathway	81	90	87	85	55
Phosphatidylinositol signaling system	23	30	25	22	23
Protein processing in endoplasmic reticulum	54	52	48	53	53
Pyrimidine metabolism	30	21	32	16	22
RNA degradation	19	15	22	26	13
Regulation of actin cytoskeleton	52	43	51	59	36
Signaling pathways regulating pluripotency of stem cells	42	41	43	32	32
Sphingolipid signaling pathway	31	40	32	33	25
Spliceosome	36	36	45	34	41
TGF-beta signaling pathway	31	30	33	24	23
Thyroid hormone signaling pathway	30	33	32	25	26
Ubiquitin mediated proteolysis	43	38	37	42	29
